# Supplementary material
Source: publisher figshare collection journal article supplement (https://acs.figshare.com/ndownloader/files/31079230)
Supplement: Supplementary file 1 [file 31079230]

## Supporting Information

### Silica-Confined Two-Atom Single-Cluster Catalyst for Direct Nonoxidative Conversion of Methane: A DFT Study

Han-Xuan Liu, Tao Ban, Xi-Yang Yu, Zheng-Qing Huang, and Chun-Ran Chang\*

Shaanxi Key Laboratory of Energy Chemical Process Intensification, School of Chemical Engineering and Technology, Xi'an Jiaotong University, Xi'an 710049, China

\*email: changcr@mail.xjtu.edu.cn

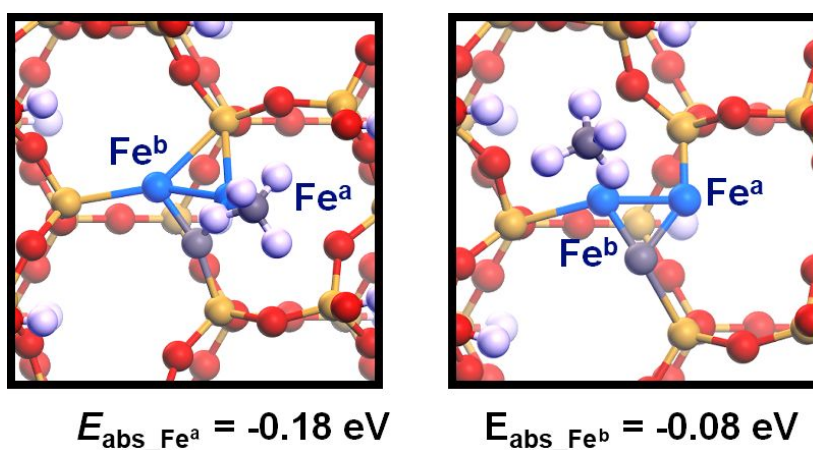

**Figure S1.** Absorption structure and energy of methane on  $\text{Fe}^a$  and  $\text{Fe}^b$  atom of  $\text{Fe}_2\text{C}@\text{SiO}_2$ .

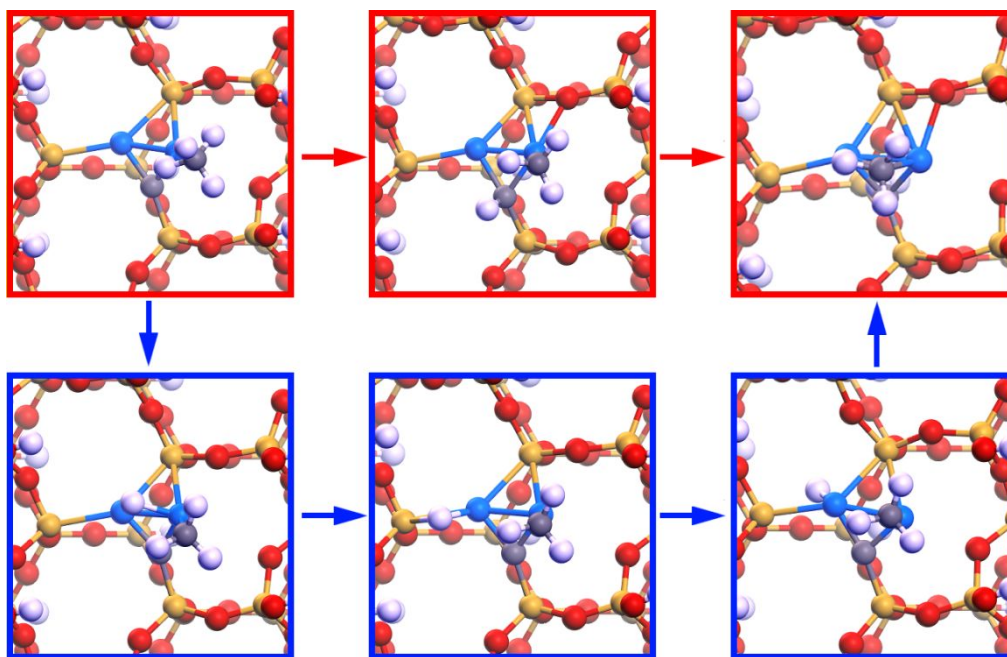

**Figure S2.** Optimized structures of different reaction paths for the dissociation of methane.

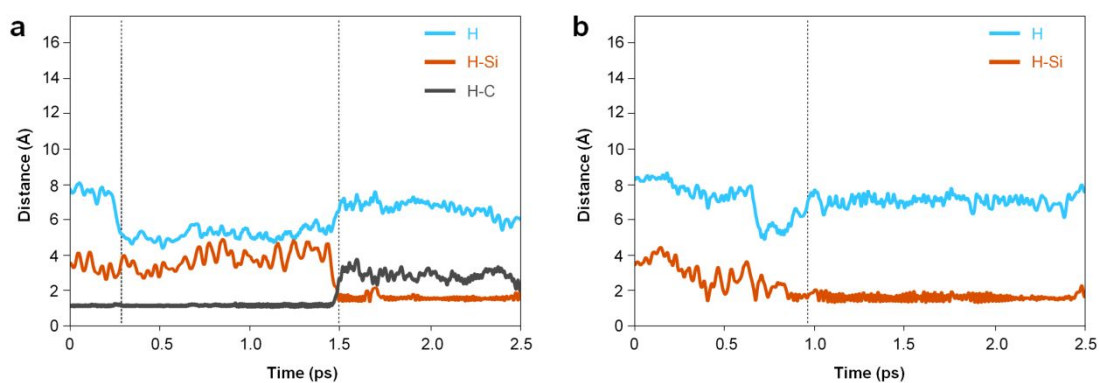

**Figure S3.** Ab-initio molecular dynamics simulation for the distance of H-Si bond, H-C bond and the  $z$  coordinate of H atom. The initiating structures are (a)  $\text{CH}_3^* + \text{H}^{\text{d}}$  and (b)  $\text{CH}_3^* + \text{H}^{\text{a}}$ .

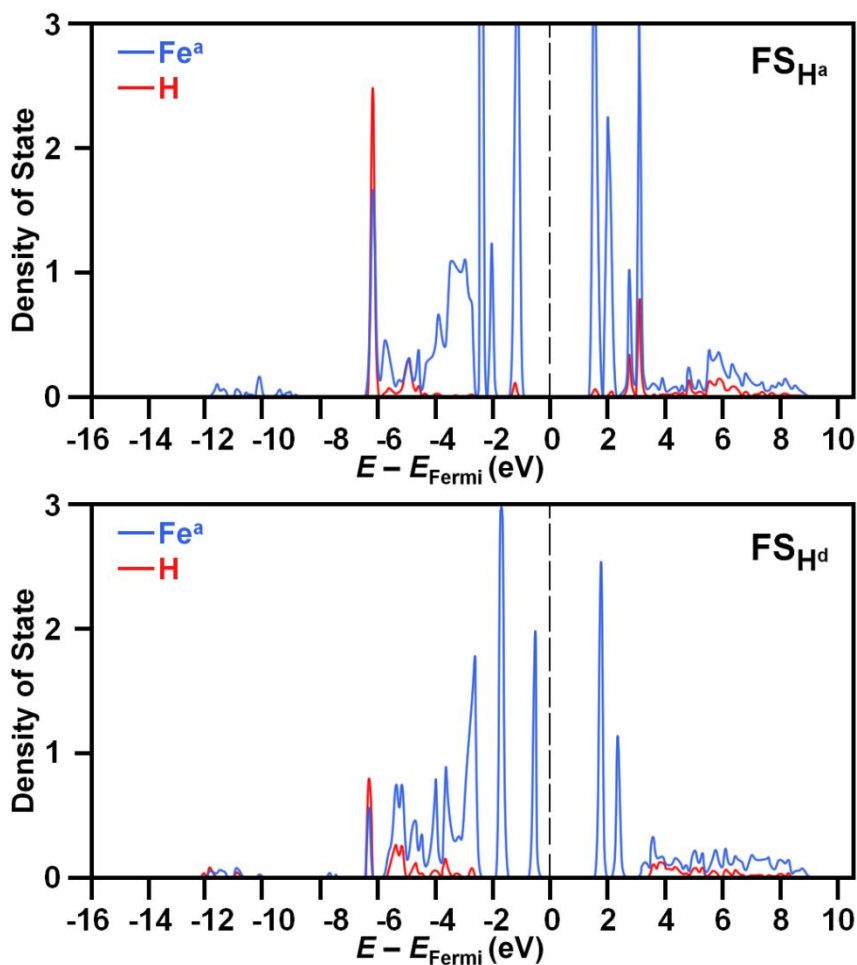

**Figure S4.** Partial density of states (PDOS) of  $d$ -band of  $\text{Fe}^a$  (cyan line) and H (red line).

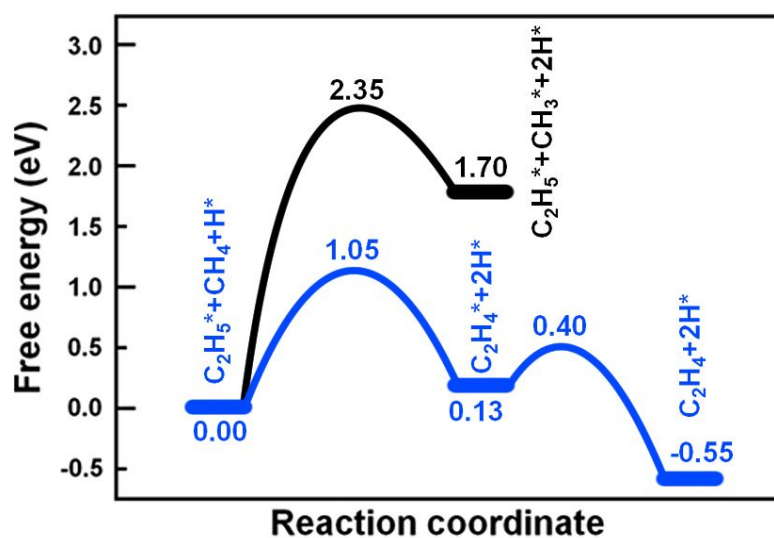

**Figure S5.** Free energy profiles for the dissociation of the methane with co-adsorption of ethyl (black line) and dehydrogenation of ethyl to ethylene (blue line).

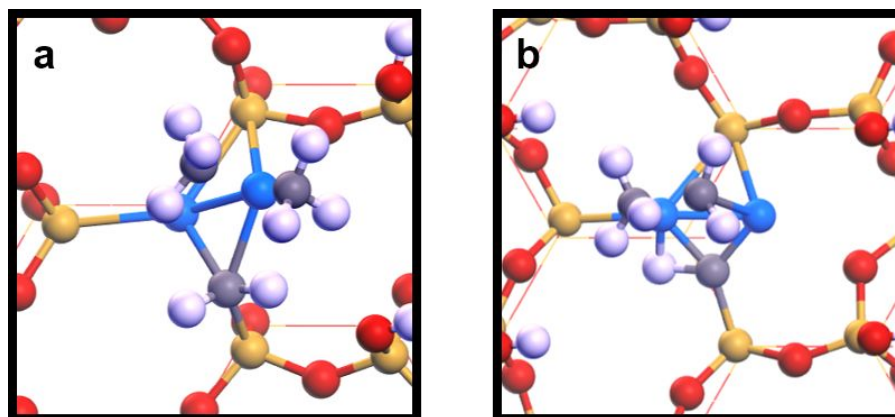

**Figure S6.** Structures of the transition states for coupling of (a) methyl-methyl and (b) methyl-methylene.

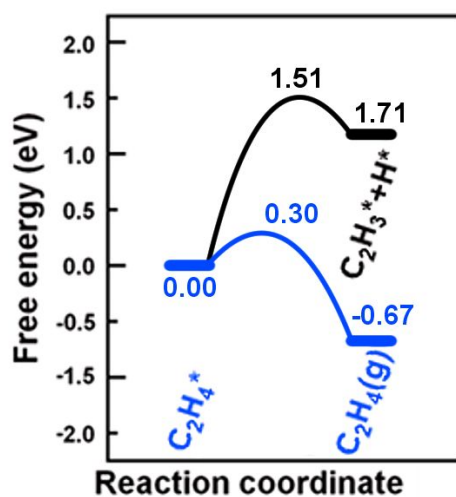

**Figure S7.** Free energy profiles of the dehydrogenation and desorption of  $C_2H_4$
